# Supplementary material for: Impaired Ca2+ release contributes to muscle weakness in a rat model of critical illness myopathy
Source: PubMed Central journal article supplement (PMC5050561; doi:10.1186/s13054-016-1417-z), 2016-08-10

S I S I S I

110  
kDa

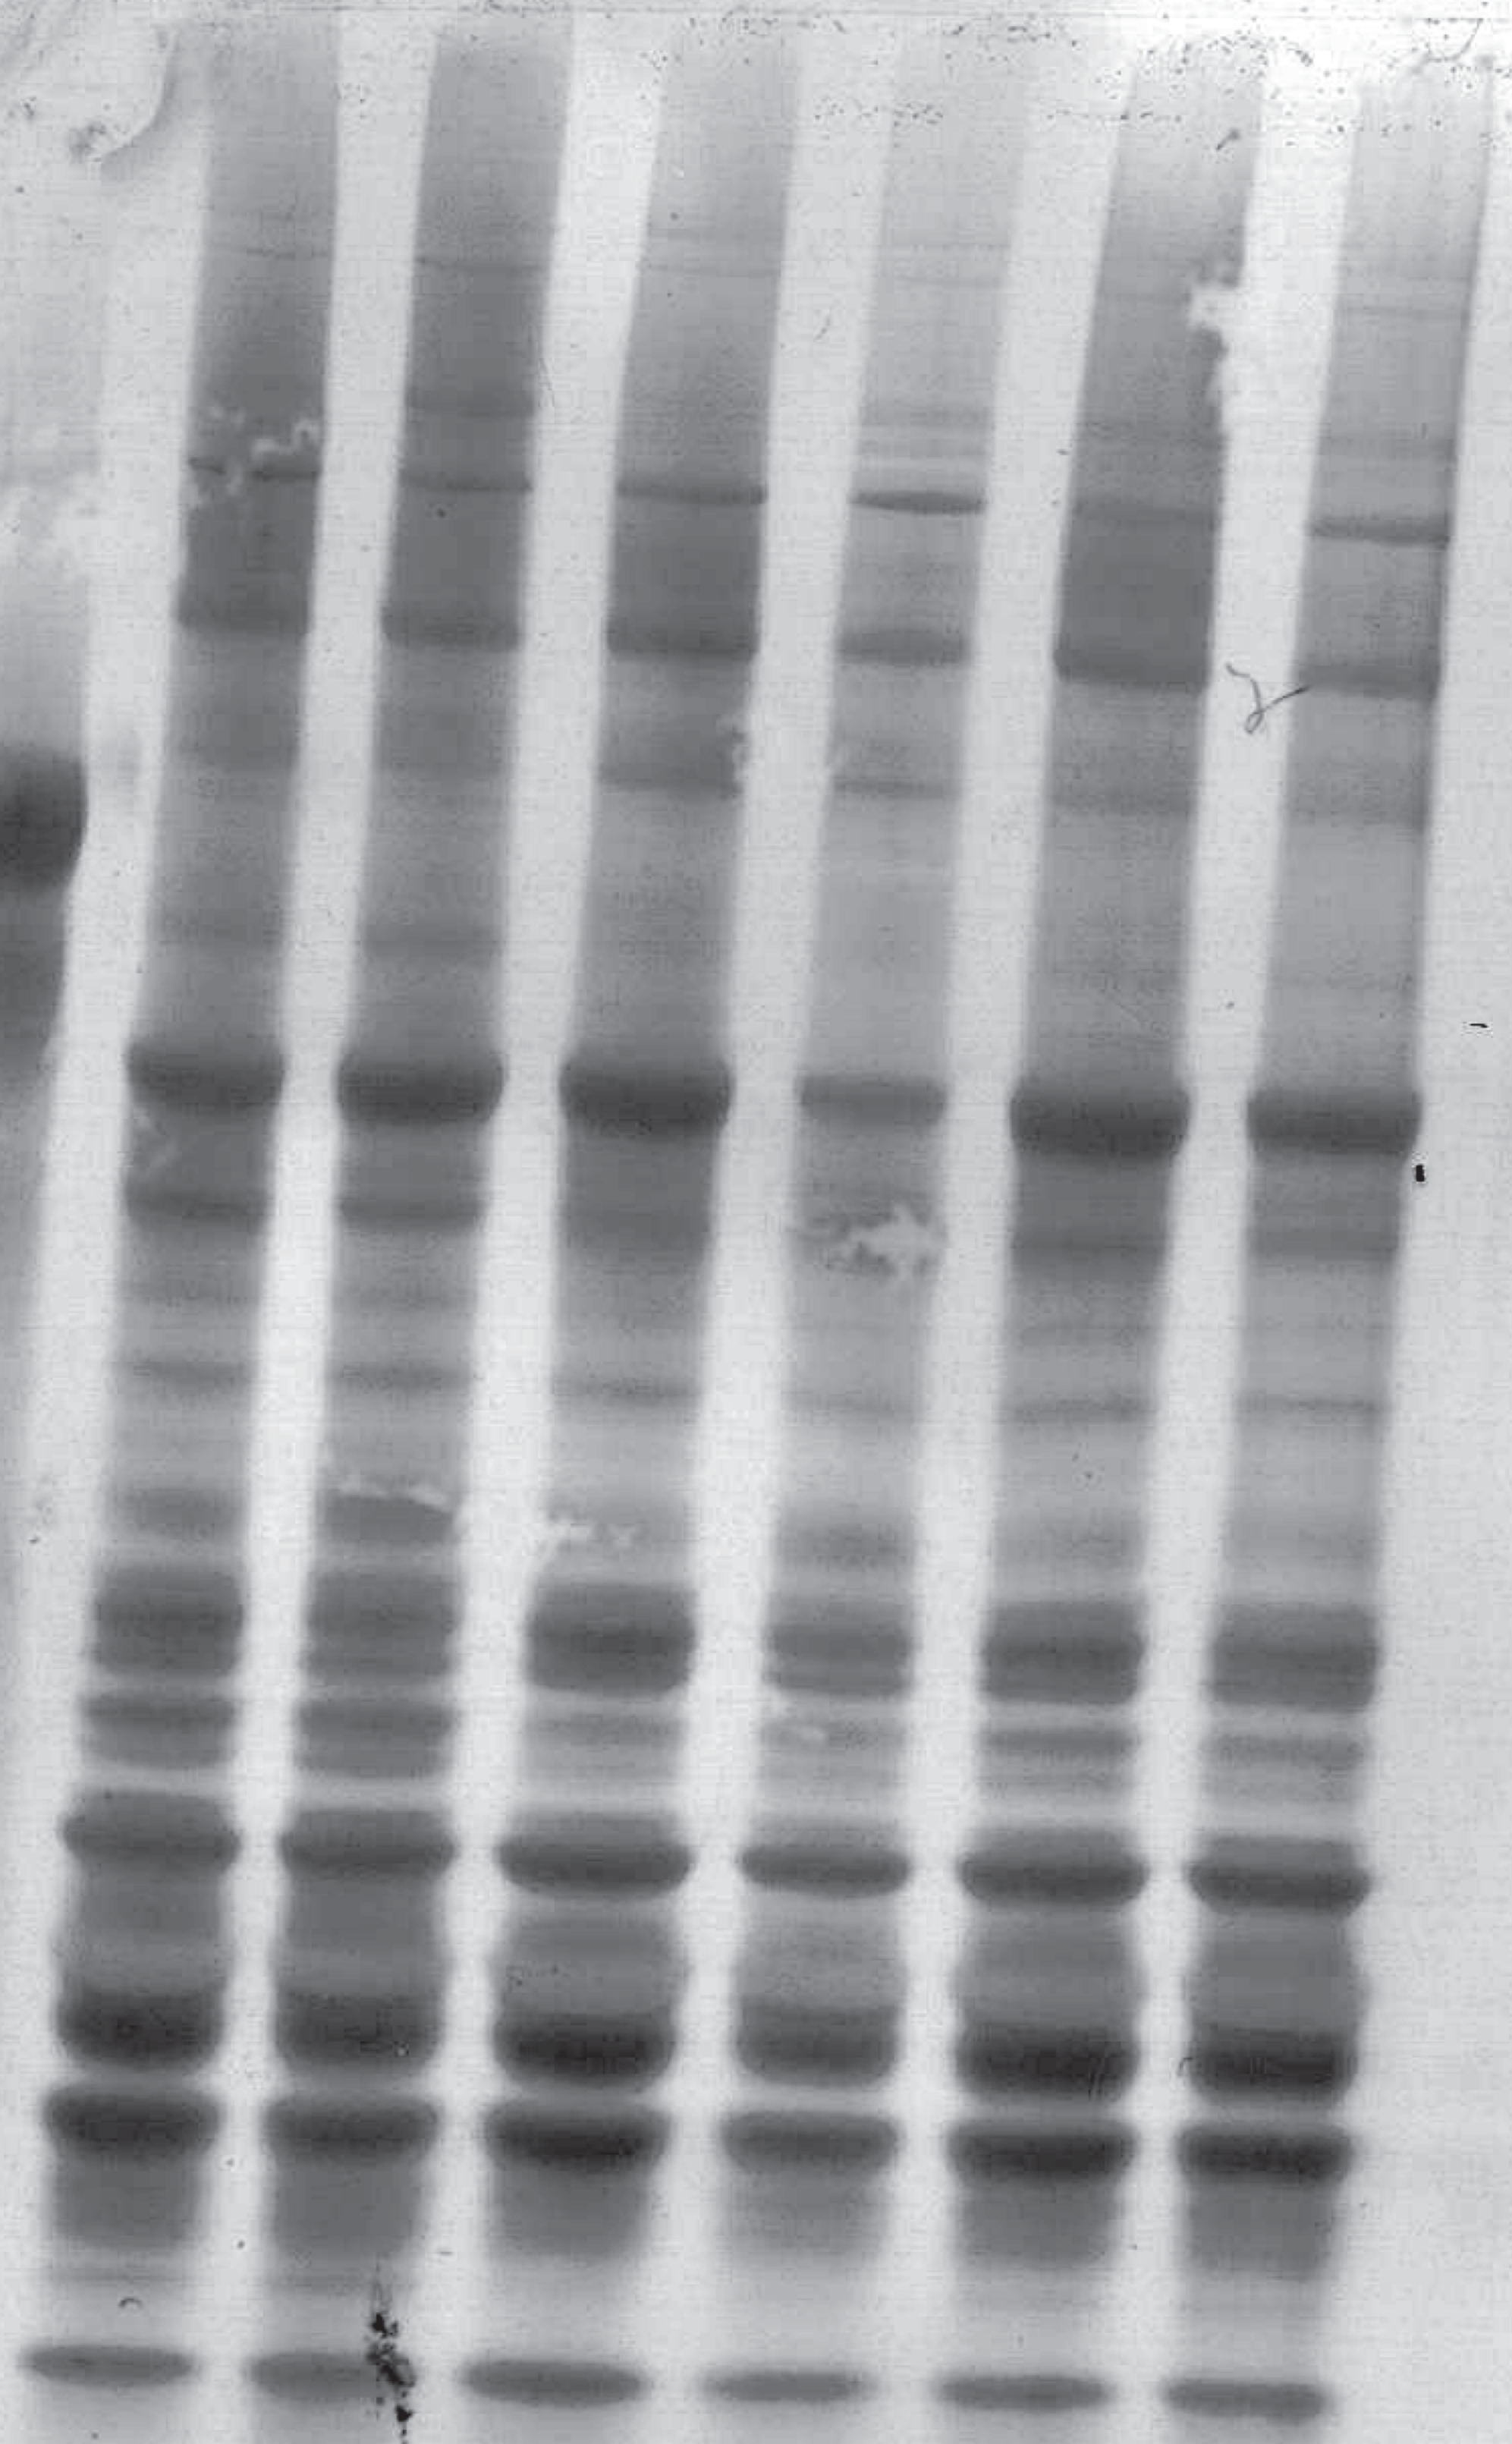

S I S I S I

110  
kDa

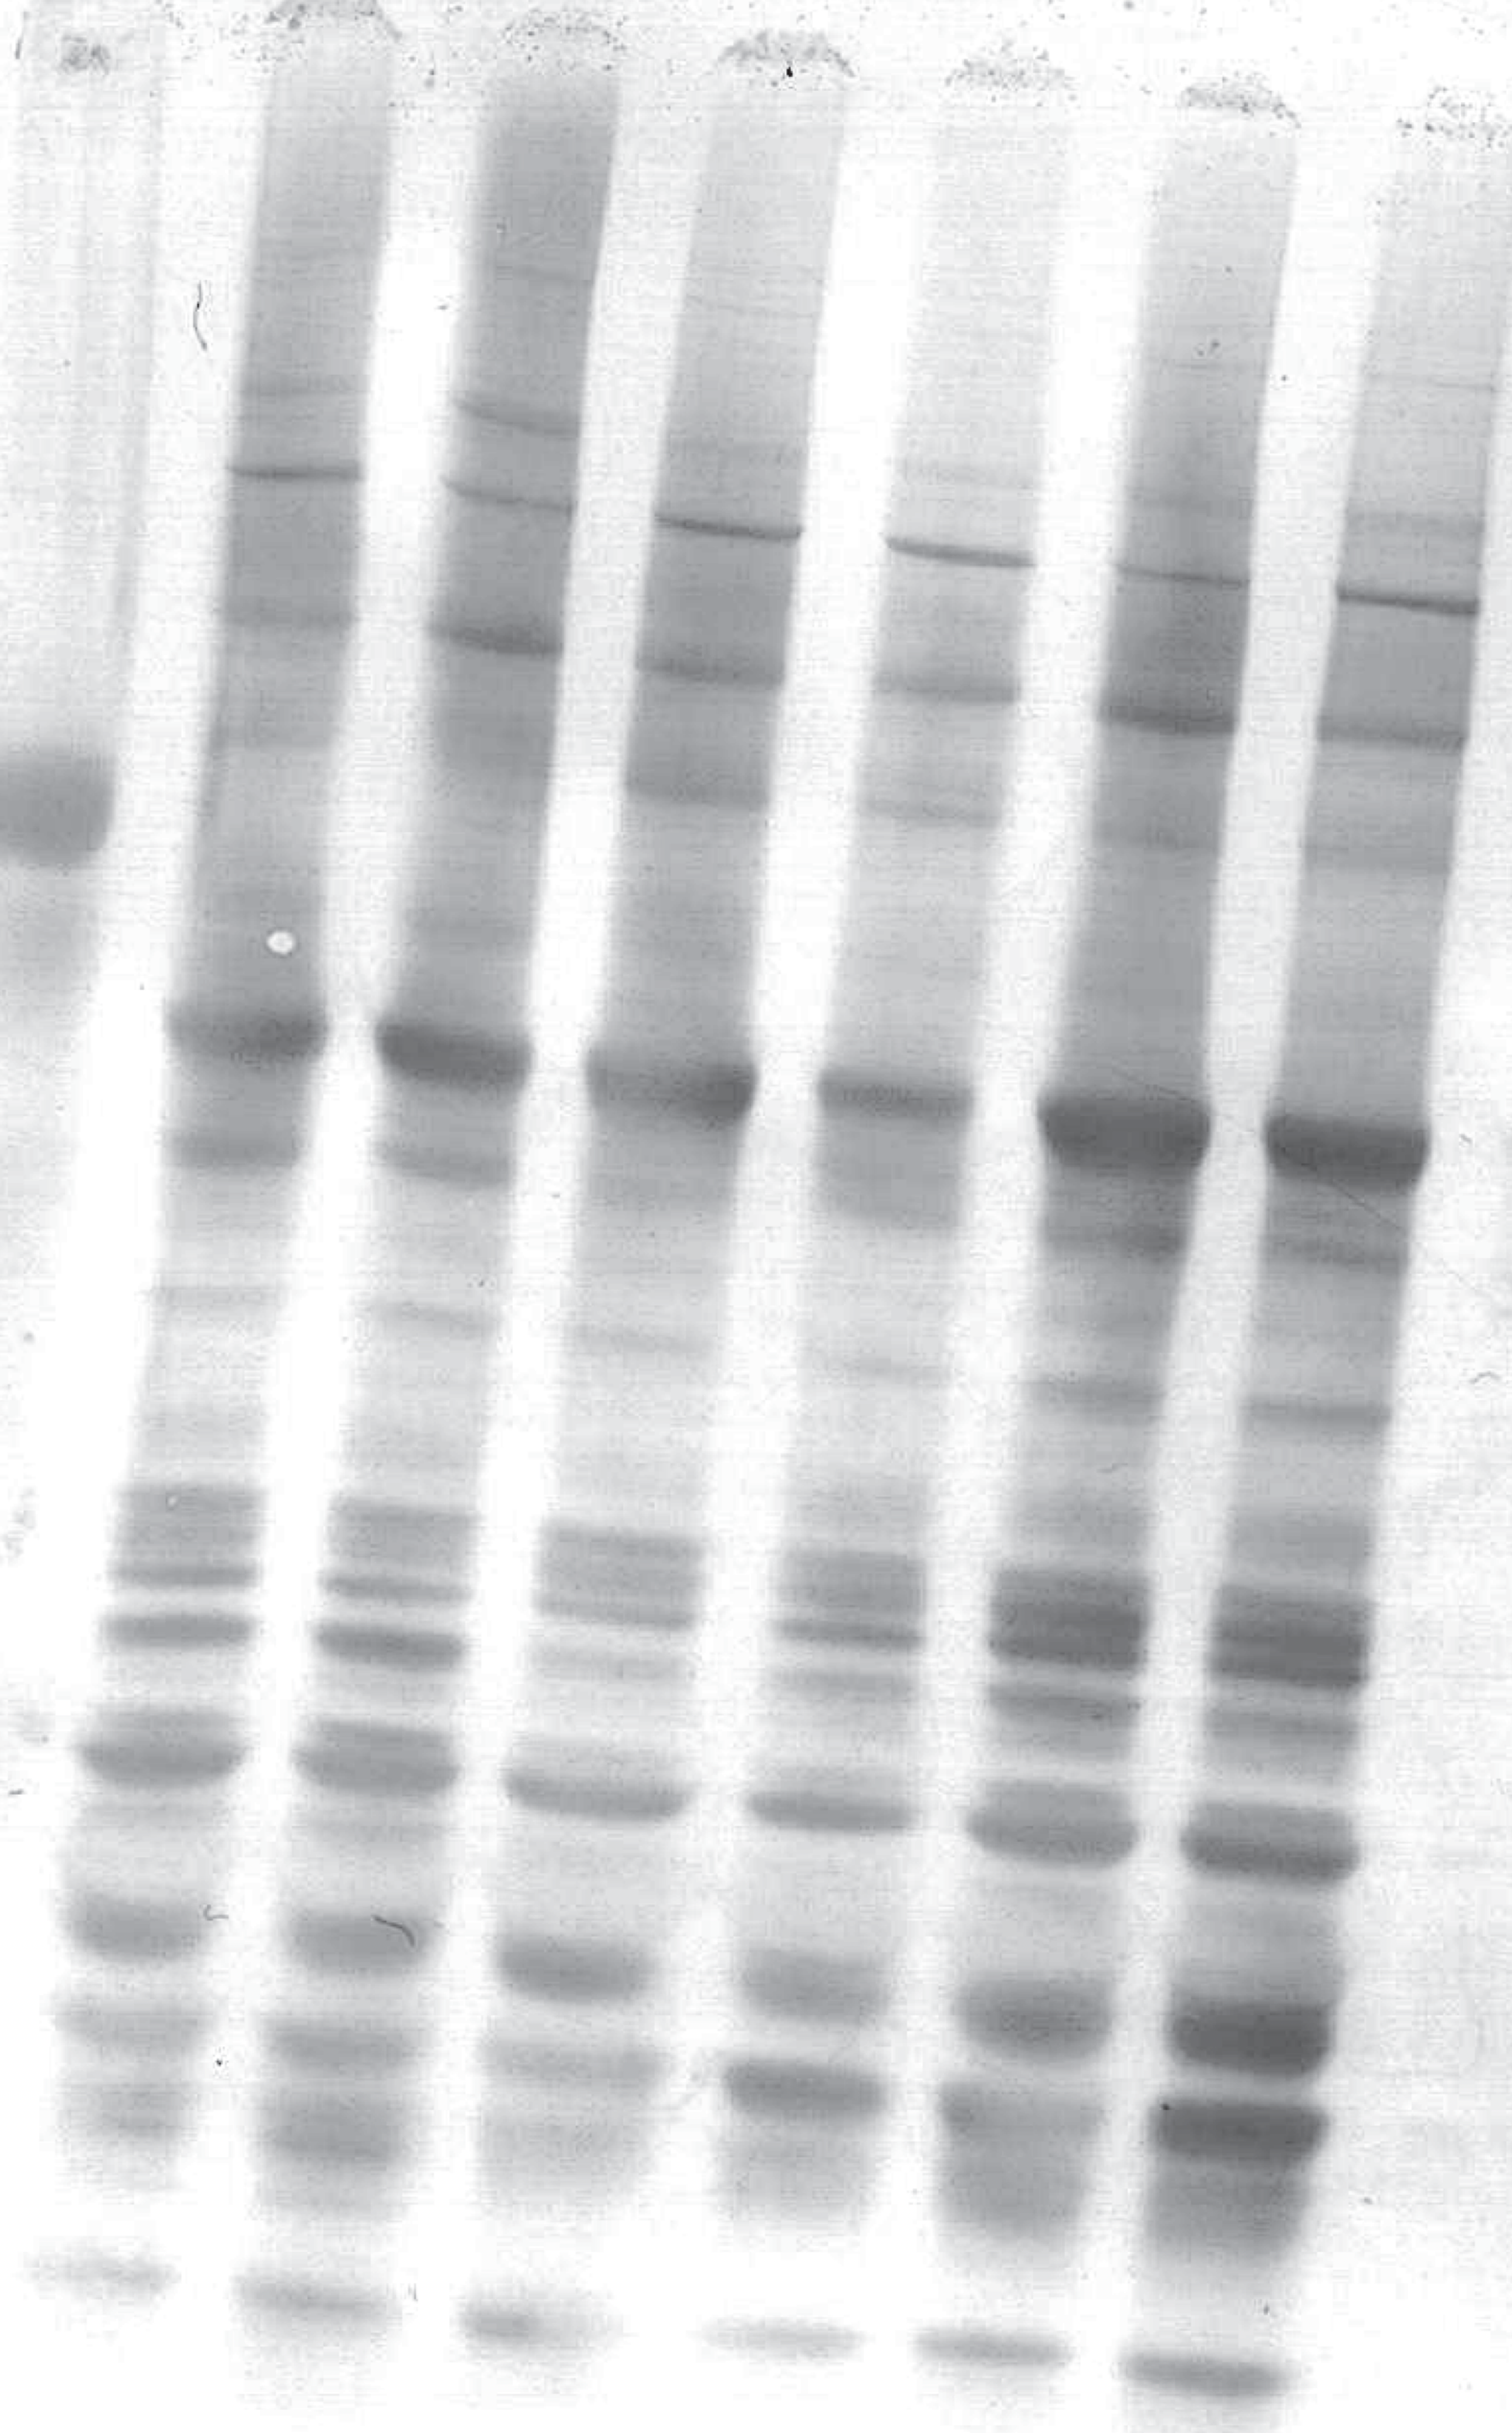

Supplement: 13054_2016_1417_MOESM1_ESM.pdf [file 13054_2016_1417_MOESM1_ESM.pdf]
